# Supplementary material for: Spacer group-controlled luminescence and response of C3-symmetric triphenylamine derivatives towards force stimuli
Source: Royal Society of Chemistry journal article supplement (doi:10.1039/d0ce01539c), 2020-11-09
Supplement: d0ce01539c1.pdf [file d0ce01539c1.pdf]

**Spacer group-controlled luminescence and response of C<sub>3</sub>-symmetric  
triphenylamine derivatives to force**

Yanning Han, Tong Zhang, Xinyu Chen, Qiao Chen, Pengchong Xue\*

Tianjin Key Laboratory of Structure and Performance for Functional Molecules  
College of Chemistry, Tianjin Normal University  
No. 393 Bin Shui West Road, Tianjin, P. R. China.  
E-mail: xuepengchong@126.com; hxxyxpc@tjnu.edu.cn

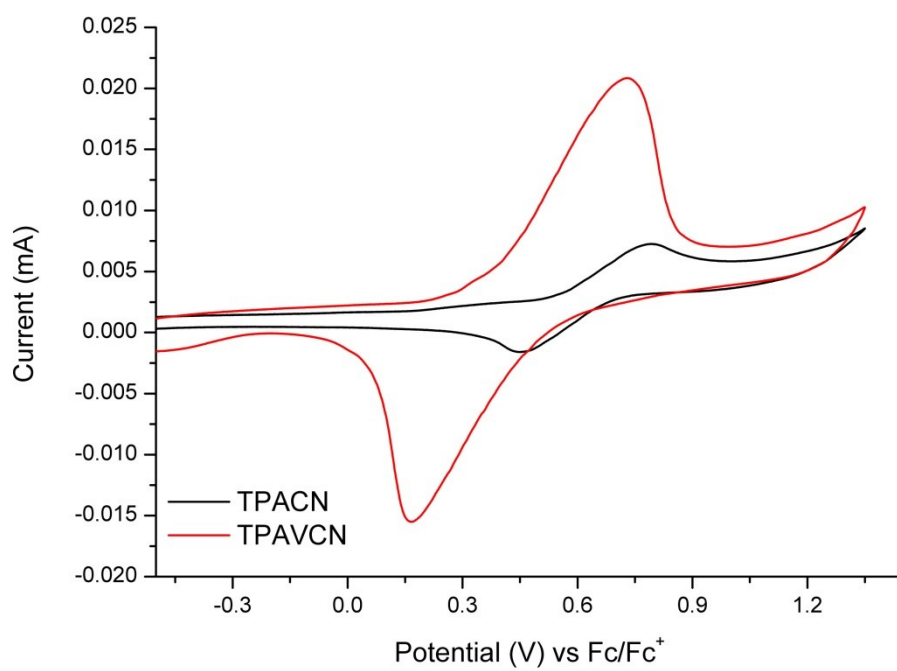

**Fig. S1** Cyclic voltammetry curves of two compounds.

**Table S1.** Photophysical data of TPACN and TPAVCN obtained by quantum chemical calculation.

|        | Dipole moment<br>(Debye) | Transition            | Transition assignment                               | E (eV) | $\lambda_{\text{abs}}$<br>(nm) | Oscillator<br>strength |
|--------|--------------------------|-----------------------|-----------------------------------------------------|--------|--------------------------------|------------------------|
| TPAVCN | 0.4229                   | $S_0 \rightarrow S_1$ | HOMO→LUMO (96.73<br>%)                              | 2.7785 | 446.22                         | 1.3087                 |
|        |                          | $S_0 \rightarrow S_2$ | HOMO→LUMO+1<br>(96.79%)                             | 2.7829 | 445.52                         | 1.1527                 |
|        |                          | $S_0 \rightarrow S_3$ | HOMO-1→LUMO+1<br>(2.07%)<br>HOMO→LUMO+2<br>(89.48%) | 3.2429 | 382.33                         | 0.0042                 |
| TPACN  | 0.0375                   | $S_0 \rightarrow S_1$ | HOMO→LUMO (97.84<br>%)                              | 3.2954 | 376.24                         | 0.7987                 |
|        |                          | $S_0 \rightarrow S_2$ | HOMO→LUMO+1<br>(97.86%)                             | 3.3153 | 373.98                         | 0.8283                 |
|        |                          | $S_0 \rightarrow S_3$ | HOMO→LUMO+2<br>(98.09%)                             | 3.8036 | 325.96                         | 0.0009                 |

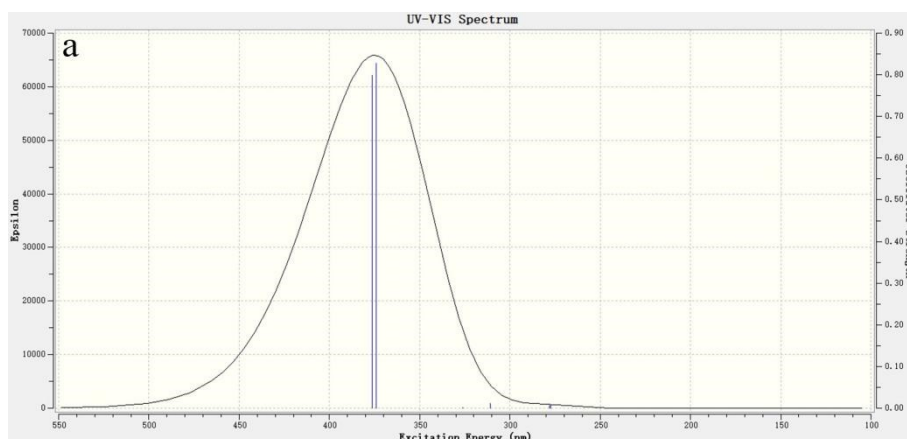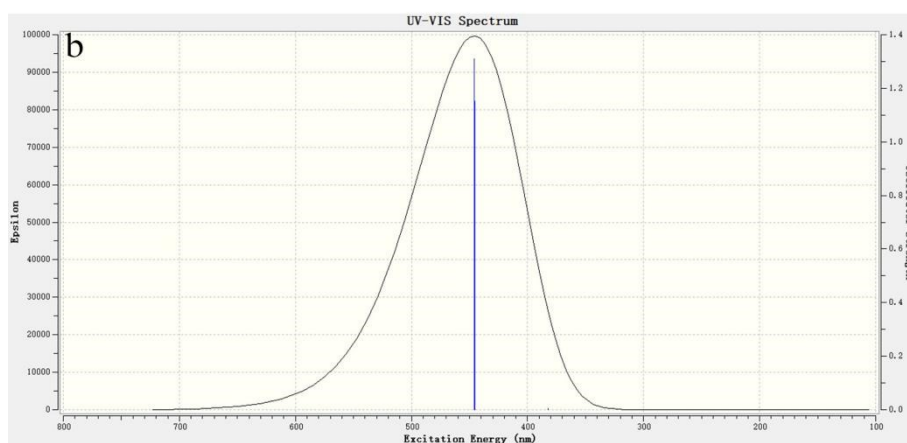

**Fig. S2** Simulated UV spectra of (a) TPACN and (b) TPAVCN.

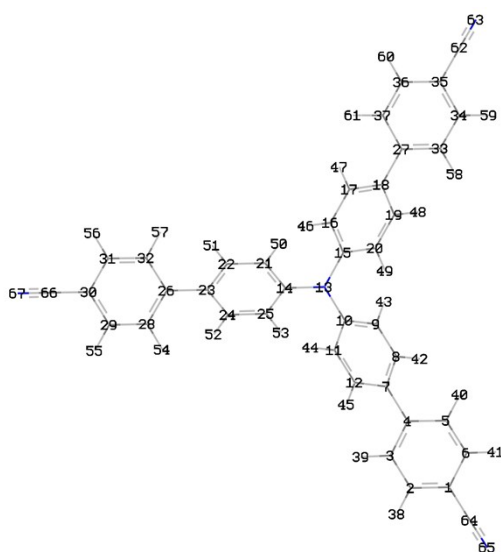

**Table S2.** Data of orbital composition analysis by natural atomic orbital (NAO) method for TPACN.

| HOMO         |                | LUMO  |         | LUMO+1 |        |
|--------------|----------------|-------|---------|--------|--------|
| 1(C)         | 1.405%         | 1(C)  | 9.987%  | 10(C)  | 0.539% |
| 3(C)         | 1.170%         | 2(C)  | 3.948%  | 14(C)  | 4.602% |
| 5(C)         | 1.170%         | 3(C)  | 3.571%  | 15(C)  | 6.111% |
| 7(C)         | 6.572%         | 4(C)  | 10.490% | 16(C)  | 1.165% |
| 9(C)         | 4.651%         | 5(C)  | 3.435%  | 17(C)  | 3.064% |
| 10(C)        | 2.503%         | 6(C)  | 4.123%  | 18(C)  | 4.362% |
| 11(C)        | 4.682%         | 7(C)  | 5.172%  | 19(C)  | 3.011% |
| <b>13(N)</b> | <b>25.418%</b> | 8(C)  | 3.665%  | 20(C)  | 1.205% |
| 14(C)        | 2.636%         | 9(C)  | 1.364%  | 21(C)  | 0.750% |
| 15(C)        | 2.655%         | 10(C) | 7.320%  | 22(C)  | 2.398% |
| 16(C)        | 4.909%         | 11(C) | 1.322%  | 23(C)  | 3.109% |
| 18(C)        | 6.944%         | 12(C) | 3.769%  | 24(C)  | 2.154% |
| 20(C)        | 4.901%         | 14(C) | 2.944%  | 25(C)  | 0.863% |
| 21(C)        | 4.848%         | 15(C) | 1.110%  | 26(C)  | 6.525% |
| 23(C)        | 6.916%         | 18(C) | 0.602%  | 27(C)  | 8.728% |
| 24(C)        | 0.509%         | 21(C) | 0.614%  | 28(C)  | 2.106% |
| 25(C)        | 4.857%         | 22(C) | 1.245%  | 29(C)  | 2.565% |
| 28(C)        | 1.237%         | 23(C) | 1.987%  | 30(C)  | 6.172% |
| 30(C)        | 1.489%         | 24(C) | 1.513%  | 31(C)  | 2.460% |
| 32(C)        | 1.231%         | 26(C) | 3.863%  | 32(C)  | 2.182% |
| 33(C)        | 1.207%         | 27(C) | 1.109%  | 33(C)  | 2.820% |
| 35(C)        | 1.450%         | 28(C) | 1.362%  | 34(C)  | 3.482% |
| 37(C)        | 1.212%         | 29(C) | 1.412%  | 35(C)  | 8.311% |
| <b>63(N)</b> | <b>0.621%</b>  | 30(C) | 3.690%  | 36(C)  | 3.299% |
| <b>65(N)</b> | <b>0.601%</b>  | 31(C) | 1.551%  | 37(C)  | 2.958% |
| <b>67(N)</b> | <b>0.637%</b>  | 32(C) | 1.250%  | 62(C)  | 1.900% |

---

|              |               |              |               |
|--------------|---------------|--------------|---------------|
| 35(C)        | 1.067%        | <b>63(N)</b> | <b>5.551%</b> |
| <b>63(N)</b> | <b>0.708%</b> | 66(C)        | 1.409%        |
| 64(C)        | 2.259%        | <b>67(N)</b> | <b>4.114%</b> |
| <b>65(N)</b> | <b>6.637%</b> |              |               |
| 66(C)        | 0.827%        |              |               |
| <b>67(N)</b> | <b>2.443%</b> |              |               |

---

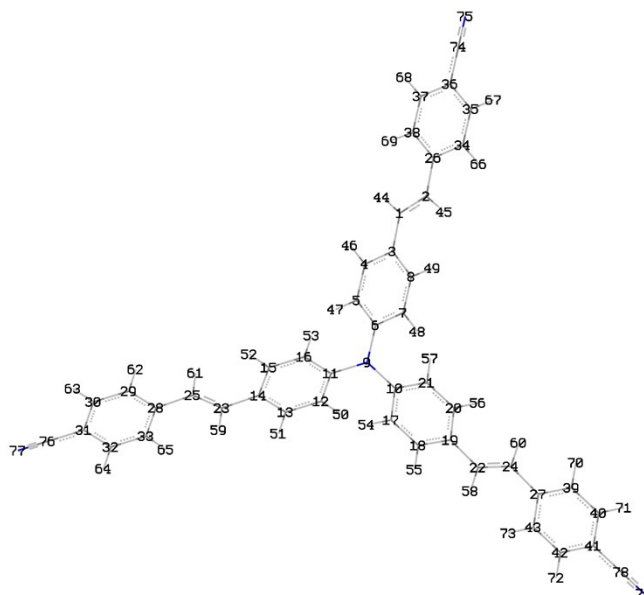

**Table S3.** Data of orbital composition analysis by natural atomic orbital (NAO) method for TPAVCN.

|             | HOMO           |       | LUMO   |       | LUMO+1 |
|-------------|----------------|-------|--------|-------|--------|
| 1(C)        | 0.904%         | 6(C)  | 0.514% | 1(C)  | 9.378% |
| 2(C)        | 5.050%         | 10(C) | 3.331% | 2(C)  | 7.341% |
| 3(C)        | 5.733%         | 11(C) | 5.781% | 3(C)  | 3.095% |
| 4(C)        | 0.721%         | 12(C) | 1.167% | 4(C)  | 2.795% |
| 5(C)        | 4.011%         | 13(C) | 2.941% | 5(C)  | 1.215% |
| 6(C)        | 2.475%         | 14(C) | 3.082% | 6(C)  | 5.617% |
| 7(C)        | 3.558%         | 15(C) | 3.813% | 8(C)  | 3.829% |
| 8(C)        | 0.683%         | 17(C) | 0.663% | 10(C) | 3.026% |
| <b>9(N)</b> | <b>19.634%</b> | 18(C) | 1.654% | 11(C) | 0.831% |
| 10(C)       | 2.388%         | 19(C) | 1.743% | 17(C) | 0.657% |
| 11(C)       | 2.305%         | 20(C) | 2.046% | 18(C) | 1.362% |
| 12(C)       | 3.763%         | 22(C) | 5.245% | 19(C) | 1.570% |
| 13(C)       | 0.651%         | 23(C) | 9.602% | 20(C) | 2.125% |
| 14(C)       | 5.305%         | 24(C) | 4.115% | 22(C) | 4.941% |
| 15(C)       | 0.612%         | 25(C) | 7.435% | 23(C) | 1.002% |
| 16(C)       | 3.348%         | 27(C) | 3.080% | 24(C) | 3.813% |
| 17(C)       | 3.886%         | 28(C) | 5.640% | 25(C) | 0.765% |
| 18(C)       | 0.670%         | 29(C) | 2.799% | 26(C) | 5.493% |
| 19(C)       | 5.523%         | 30(C) | 2.612% | 27(C) | 2.887% |
| 20(C)       | 0.660%         | 31(C) | 6.823% | 28(C) | 0.587% |
| 21(C)       | 3.457%         | 32(C) | 1.323% | 31(C) | 0.706% |
| 22(C)       | 0.853%         | 33(C) | 3.903% | 34(C) | 2.746% |
| 23(C)       | 0.806%         | 39(C) | 1.542% | 35(C) | 2.540% |
| 24(C)       | 4.838%         | 40(C) | 1.423% | 36(C) | 6.668% |
| 25(C)       | 4.634%         | 41(C) | 3.740% | 37(C) | 1.288% |
| 29(C)       | 1.110%         | 42(C) | 0.723% | 38(C) | 3.818% |

---

|       |        |              |               |              |               |
|-------|--------|--------------|---------------|--------------|---------------|
| 31(C) | 1.347% | 43(C)        | 2.145%        | 39(C)        | 1.431%        |
| 33(C) | 1.056% | 76(C)        | 1.058%        | 40(C)        | 1.339%        |
| 34(C) | 1.213% | <b>77(N)</b> | <b>3.937%</b> | 41(C)        | 3.494%        |
| 36(C) | 1.476% | 78(C)        | 0.577%        | 42(C)        | 0.677%        |
| 38(C) | 1.154% | <b>79(N)</b> | <b>2.156%</b> | 43(C)        | 2.000%        |
| 39(C) | 1.159% |              |               | 74(C)        | 1.031%        |
| 41(C) | 1.409% |              |               | <b>75(N)</b> | <b>3.843%</b> |
| 43(C) | 1.104% |              |               | 78(C)        | 0.542%        |
| 75(N) | 0.623% |              |               | <b>79(N)</b> | <b>2.017%</b> |
| 77(N) | 0.567% |              |               |              |               |
| 79(N) | 0.594% |              |               |              |               |

---



**Table S4.** Crystal data of TPAVCN

|                   | TPAVCN                                             |
|-------------------|----------------------------------------------------|
| Molecular formula | C <sub>39</sub> H <sub>30</sub> N <sub>4</sub>     |
| Space group       | <i>Cc</i>                                          |
| Cell lengths      | a=10.4053(2) Å<br>b=32.0280(6) Å<br>c=10.3784(2) Å |
| Cell angles       | α=90°<br>β= 93.2313(18)°<br>γ=90°                  |
| Cell volume       | 3453.20(12)                                        |
| Z                 | 4                                                  |
| R-factor (%)      | 6.34                                               |

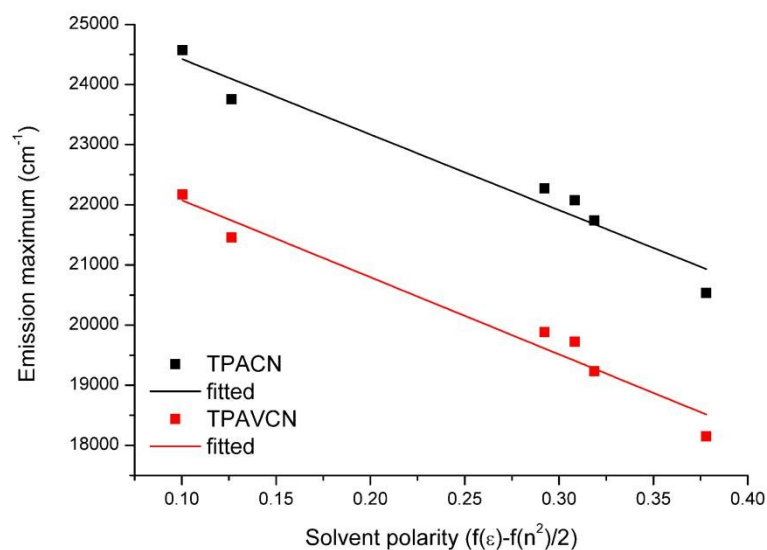**Fig. S3** The plots of  $\tilde{\nu}^{\max}$  of two compounds against the solvent polarity parameter ( $f(\epsilon) - \frac{1}{2}f(n^2)$ ).

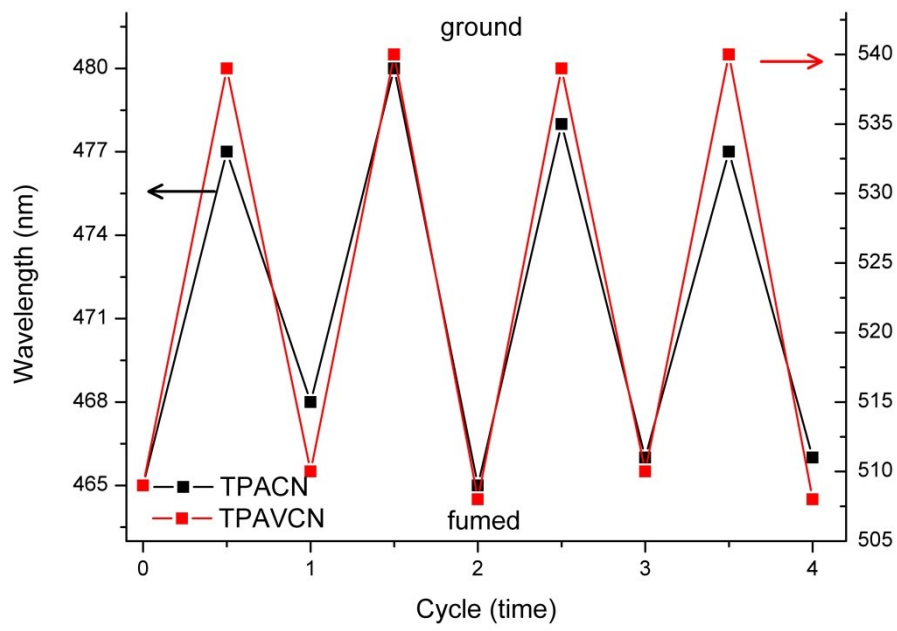

**Fig. S4** Reversible curves of fluorescence maxima.

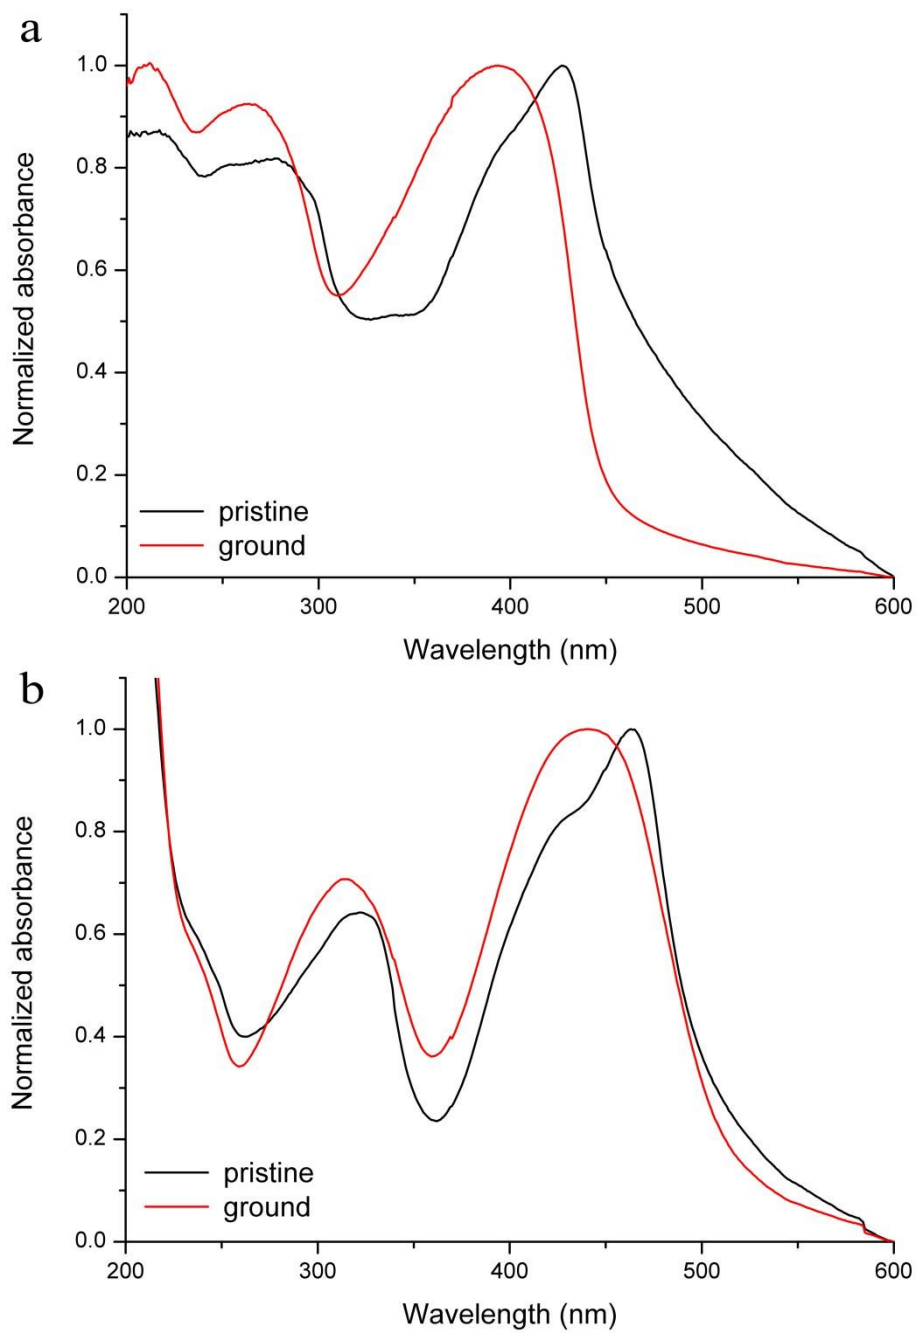

**Fig. S5** UV-Vis absorption spectra of (a) TPACN and (b) TPAVCN before and after grinding.

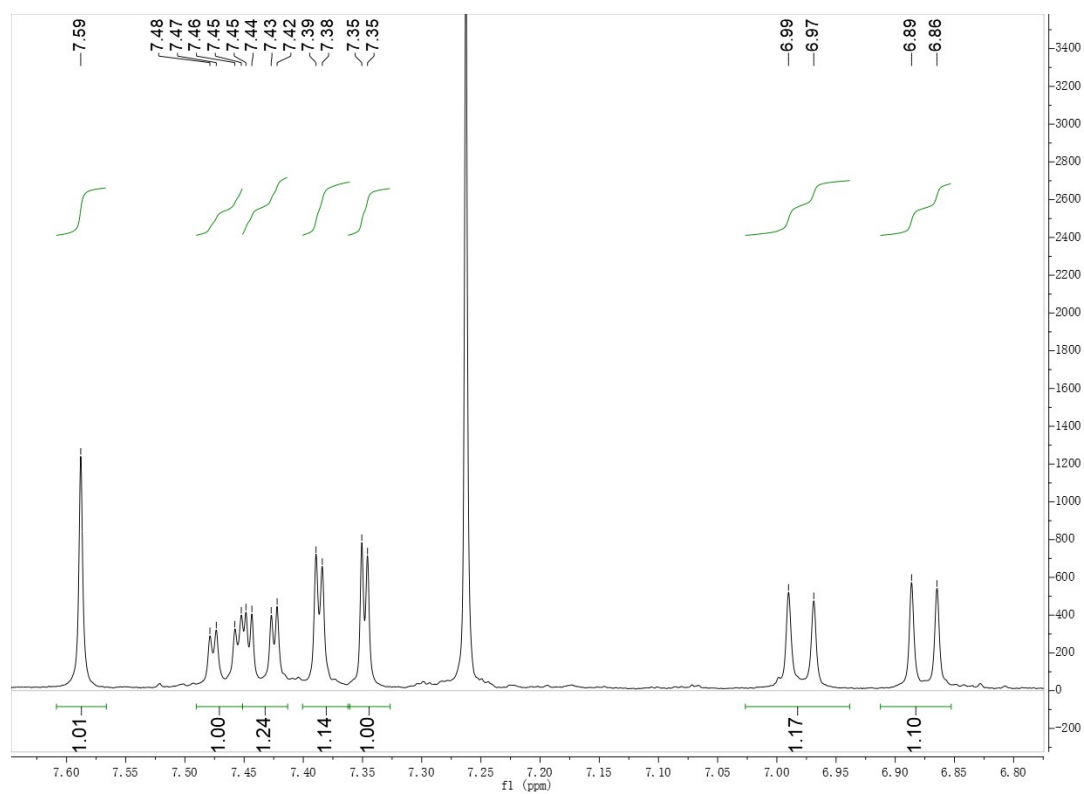

**Fig. S6**  $^1\text{H}$  NMR spectrum of TPACN in  $\text{CDCl}_3$ .

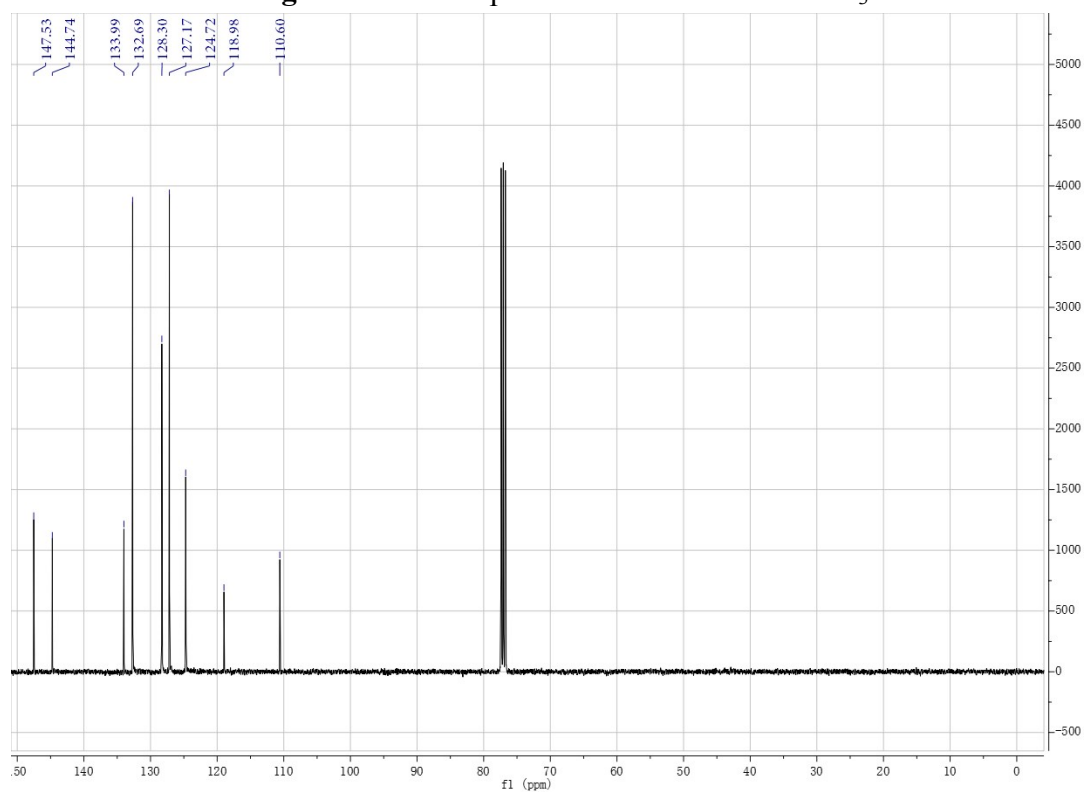

**Fig. S7**  $^{13}\text{C}$  NMR spectrum of TPACN in  $\text{CDCl}_3$ .

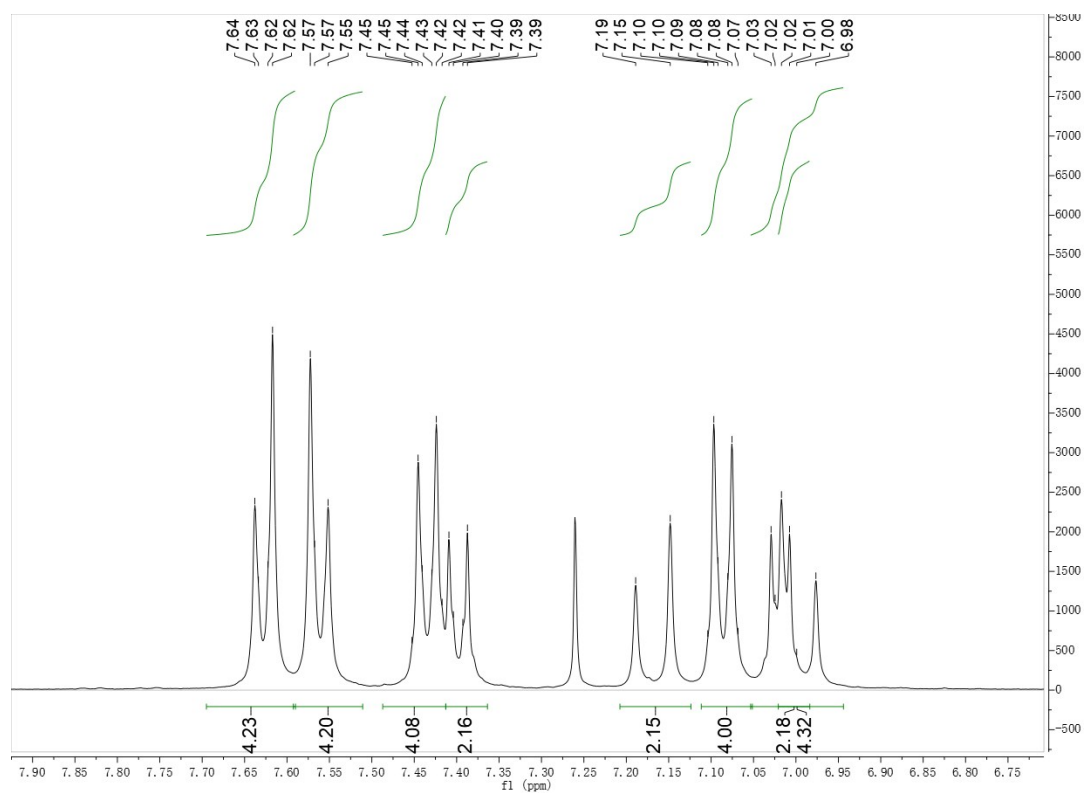

**Fig. S8**  $^1\text{H}$  NMR spectrum of TPAVCN in  $\text{CDCl}_3$ .

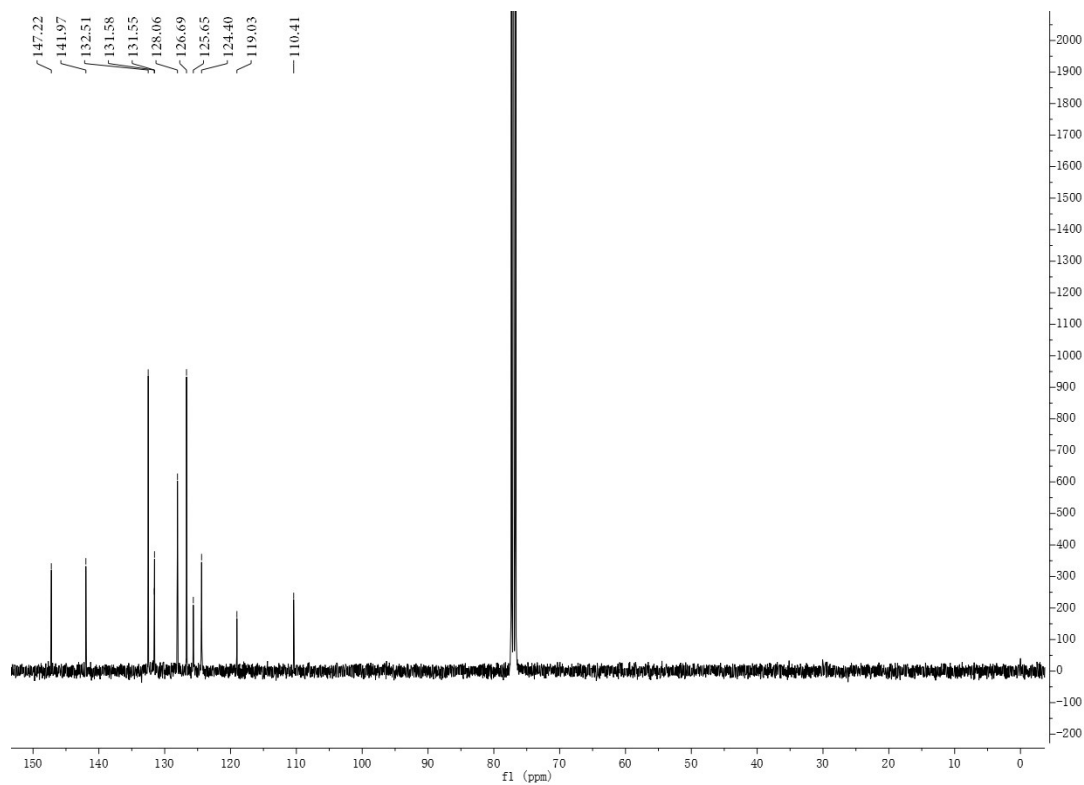

**Fig. S9**  $^{13}\text{C}$  NMR spectrum of TPAVCN in  $\text{CDCl}_3$ .
